# Supplementary material for: Diffuse-Type Gastric Carcinoma: Progression, Angiogenesis, and Transforming Growth Factor β Signaling
Source: PubMed Central journal article supplement — J Natl Cancer Inst. 2009 Apr 15;101(8):592–604. doi: 10.1093/jnci/djp058 (PMC2669102; doi:10.1093/jnci/djp058), 2009-04-15
Supplement: djp058_2.pdf [file djp058_2.pdf]

## Supplementary Tables

**Supplementary Table 1.** Primer sequences for reverse transcription-polymerase chain reaction

| Gene         | Primer sequence                       |
|--------------|---------------------------------------|
| Human GAPDH  | Forward 5'-GAAGGTGAAGGTCGGAGTC-3'     |
|              | Reverse 5'-GAAGATGGTGATGGGATTTC-3'    |
| Human Smad7  | Forward 5'-CCTTAGCCGACTCTGCCAACTA-3'  |
|              | Reverse 5'-CCAGATAATTCGTTCCCCCTGT-3'  |
| Human TSP-1  | Forward 5'-AACAAACCCACACCCAGTTTG-3'   |
|              | Reverse 5'-TTGAAGCAGGCATCAGGCAC-3'    |
| Human COL1A1 | Forward 5'-AGGACAAGAGGCATGTCTGGTT-3'  |
|              | Reverse 5'-TTGCAGTGGTAGGTGATGTTCTG-3' |
| Mouse Col1A1 | Forward 5'-TTCACCTACAGCACGCGCTTGTG-3' |
|              | Reverse 5'-GATGACTGTCTTGCCCCAAGTT-3'  |

**Supplementary Table 2.** List of genes from the Kyoto Encyclopedia of Genes and Genomes (KEGG) pathways extracted by DAVID program\*

| Probe ID    | Signal intensity |       | dnTβRII<br>/GFP ratio | Gene<br>symbol  | KEGG pathway |          |          |
|-------------|------------------|-------|-----------------------|-----------------|--------------|----------|----------|
|             | dnTβRII          | GFP   |                       |                 | <i>a</i>     | <i>b</i> | <i>c</i> |
| 202310_s_at | 43.9             | 230.4 | 0.19                  | <i>COL1A1</i>   | x            | x        | x        |
| 201110_s_at | 91.3             | 454   | 0.20                  | <i>THBS1</i>    | x            | x        | x        |
| 235086_at   | 42.3             | 179.3 | 0.24                  | <i>THBS1</i>    | x            | x        | x        |
| 202267_at   | 174.1            | 813.2 | 0.21                  | <i>LAMC2</i>    | x            | x        | x        |
| 209800_at   | 76.2             | 386.6 | 0.20                  | <i>KRT16</i> †  | x            |          |          |
| 203879_at   | 9.7              | 69.9  | 0.14                  | <i>PIK3CD</i> † |              | x        |          |

\* *a* = cell communication; *b*, focal adhesion; *c*, extracellular matrix–receptor interaction; x, included; KEGG = Kyoto Encyclopedia of Genes and Genomes; ID = identification number.

†*KRT16* and *PIK3CD* genes encode keratin 16 and the catalytic, delta polypeptide of phosphatidylinositol-3-kinase, respectively.

**Supplementary Table 3.** Relationship between phosphorylation of Smad2 and expression of thrombospondin-1 in human gastric cancer specimen\*

| TSP-1 expression | No. of specimens<br>Phosphorylated Smad2 |          | <i>P</i> value† |
|------------------|------------------------------------------|----------|-----------------|
|                  | Positive                                 | Negative |                 |
| Positive         | 44                                       | 14       |                 |
| Negative         | 20                                       | 24       | .002            |

\* TSP-1 = thrombospondin-1.

† Obtained from a two-sided  $\chi^2$  test.
